# Supplementary material for: Mesoscale, long-time mixing of chromosomes and its connection to polymer dynamics
Source: PLOS journal article supplement (doi:10.1371/journal.pcbi.1011142), 2023-05-25

(a) Initial structure of single chain

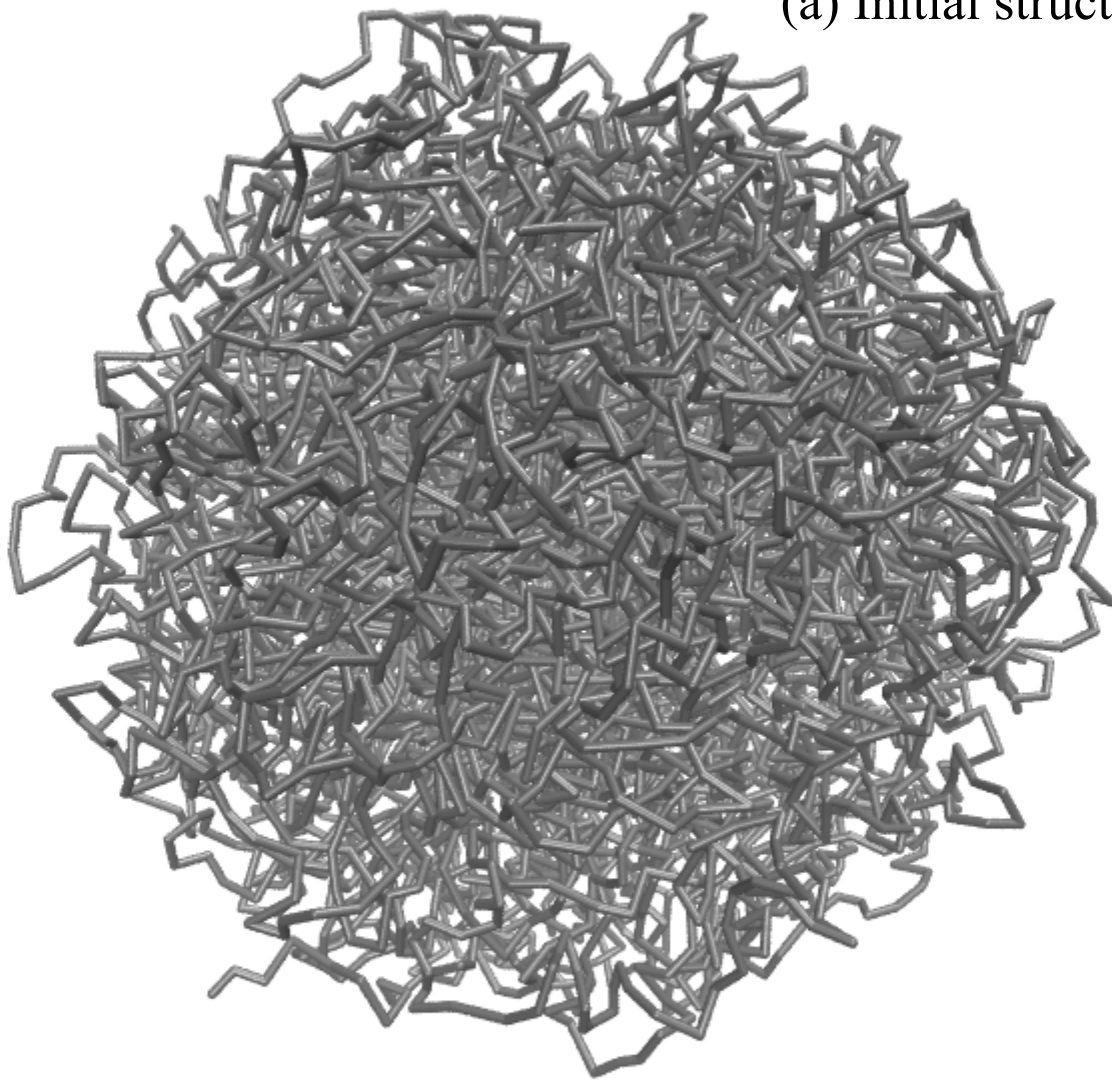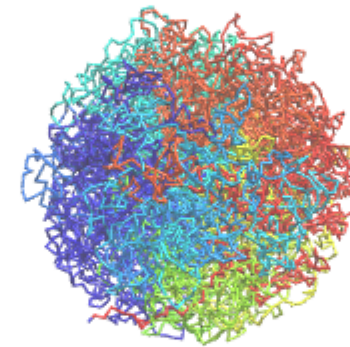

(b) Late time snapshot of self-avoiding chain

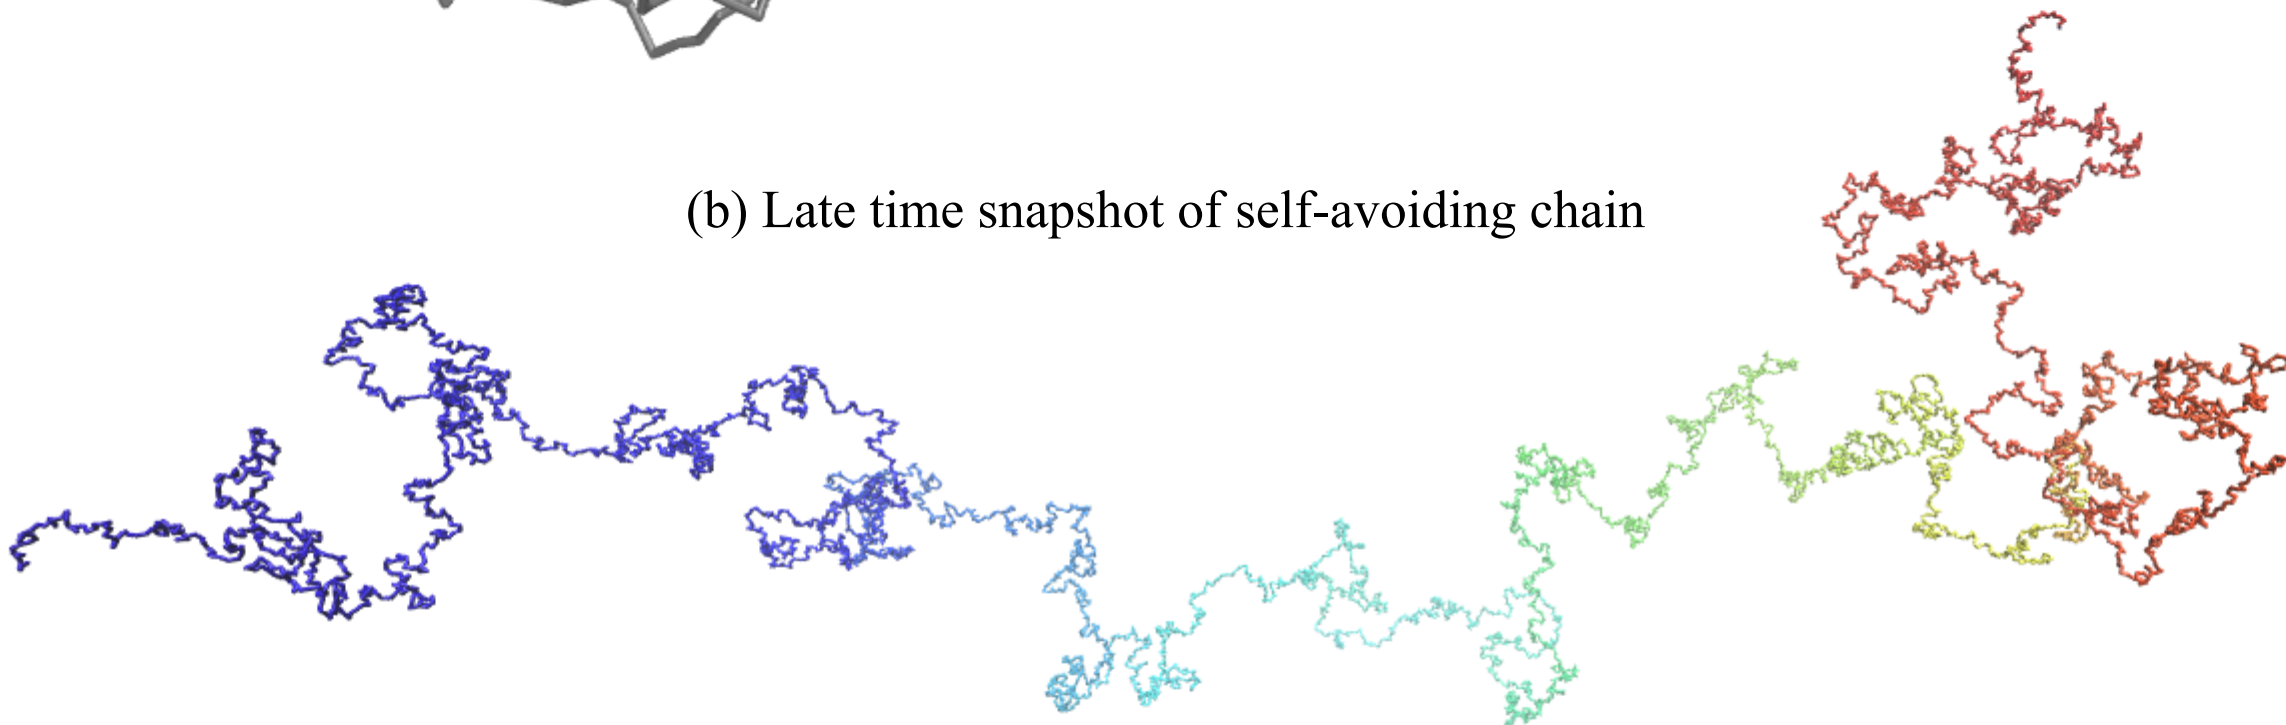

Supplement: S5 (10.1371/journal.pcbi.1011142.s005) [file journal.pcbi.1011142.s005]
